# Supplementary material for: Myostatin Inhibits Vascular Smooth Muscle Cell Proliferation and Local 14q32 microRNA Expression, But Not Systemic Inflammation or Restenosis
Source: PubMed Central journal article supplement (PMC7278907; doi:10.3390/ijms21103508), 2020-05-15
Supplement: ijms-21-03508-s001.pdf [file ijms-21-03508-s001.pdf]

# Myostatin Inhibits Vascular Smooth Muscle Cell Proliferation and Local 14q32 microRNA Expression, But Not Systemic Inflammation or Restenosis

Eveline A.C. Goossens, Margreet R. de Vries, J. Wouter Jukema, Paul H.A. Quax and A. Yaël Nossent

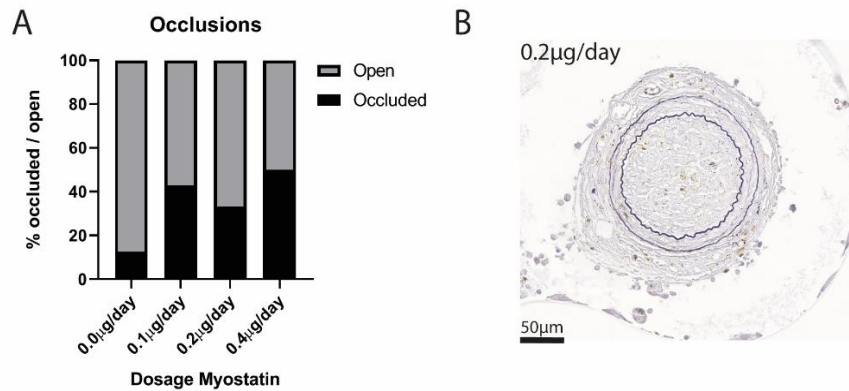

**Figure 1. A-B: Occluded cuffed femoral arteries in different treatment groups.** **A** – Occlusion percentages in different treatment groups. Control group N=8, 0.1µg/day N=7, 0.2µg/day N=6, 0.4µg/day N=8. **B** – Representative example of occluded cuffed femoral artery. Chi Square test did not show significant differences between groups.

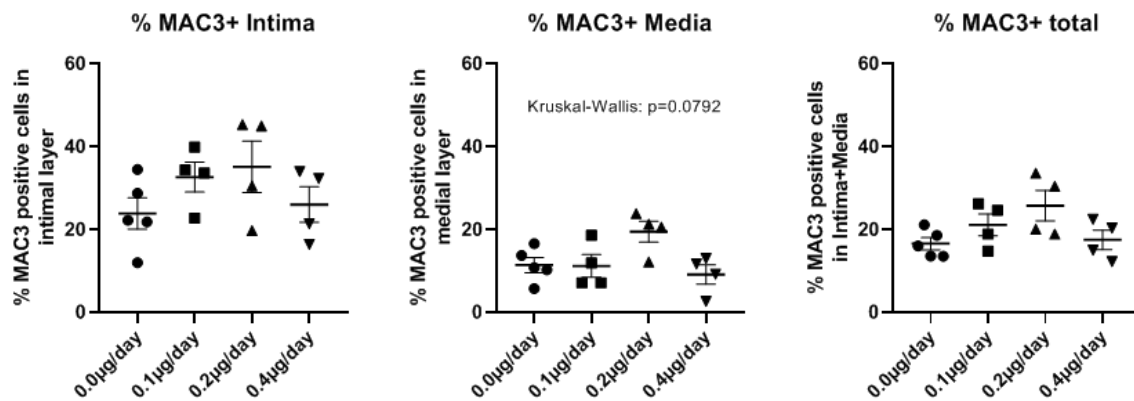

**Figure 2. A-C: Quantification of MAC3+ cells in different layers as percentage of total amount of cells in different treatment groups.** **A** – Percentage of MAC3+ cells in the intimal layer did not differ between treatment groups. **B** – Percentage of MAC3+ cells in the medial layer did not differ between treatment groups. **C** – Percentage of MAC3+ cells in the intimal and medial layer together did not differ between treatment groups. Kruskal-Wallis test did not show any significant differences between groups.

**Table 1.** qPCR Primer Sequences.

|          | <b>Forward Sequence</b> | <b>Reverse Sequence</b> |
|----------|-------------------------|-------------------------|
| MMU-PCNA | TCACAAAAGCCACTCCACTGT   | CTTTAAGTGTCCCATGTCAGCA  |
| MMU-MSTN | TGATCTTGCTGTAACTTCCCA   | TCATCGCAGTCAAGCCCAAAG   |
| GAPDH    | CACCACCATGGAGAAGGC      | AGCAGTTGGTGGTGCAGGA     |
